# Supplementary material
Source: PubMed Central journal article supplement (PMC9084242)
Supplement: NIHMS1789713-supplement-supplemental_tables.pdf [file NIHMS1789713-supplement-supplemental_tables.pdf]

**Table S1: Study cohort demographics information**

|                             |                      |
|-----------------------------|----------------------|
| <b>N</b>                    | 60                   |
| <b>age (median [range])</b> | 28.00 [19.00, 73.00] |

|                      |              |           |
|----------------------|--------------|-----------|
| <b>race (%)</b>      | Asian        | 2 (3.3)   |
|                      | Black        | 6 (10.0)  |
|                      | Other        | 6 (10.0)  |
|                      | White        | 46 (76.7) |
| <b>gender (%)</b>    | Female       | 26 (43.3) |
|                      | Male         | 34 (56.7) |
| <b>ethnicity (%)</b> | Hispanic     | 10 (16.7) |
|                      | Non-Hispanic | 50 (83.3) |

|                                  |     |           |
|----------------------------------|-----|-----------|
| <b>Self-reported conditions:</b> |     |           |
| <b>copd (%)</b>                  | No  | 59 (98.3) |
|                                  | Yes | 1 (1.7)   |
| <b>asthma (%)</b>                | No  | 58 (96.7) |
|                                  | Yes | 2 (3.3)   |
| <b>cancer (%)</b>                | No  | 58 (96.7) |
|                                  | Yes | 2 (3.3)   |
| <b>immunodeficiency (%)</b>      | No  | 58 (96.7) |
|                                  | Yes | 1 (1.7)   |
|                                  | NA  | 1 (1.7)   |
| <b>anemia (%)</b>                | No  | 58 (96.7) |
|                                  | Yes | 1 (1.7)   |
|                                  | NA  | 1 (1.7)   |

**Table S2. Comparing model fits to longitudinal viral load data from nasal swab samples using the corrected AIC (AICc) scores.** The best overall model is the refractory cell model assuming that the parameter  $\Phi$  covaries with the age of individuals and the parameters  $\beta, \rho$  covaries with viral type, i.e. non-B1.1.7 vs. B1.1.7 (its AICc score is bolded and underlined).

| Model                            | Assumptions on $\beta$ and $\pi$ | Covariate                                  |                                       | AICc                 |
|----------------------------------|----------------------------------|--------------------------------------------|---------------------------------------|----------------------|
|                                  |                                  | Age                                        | Viral type                            |                      |
| TCL model                        | Correlation                      | -                                          | -                                     | 1924.9               |
|                                  | Fixed effect $\beta$             | -                                          | -                                     | 1944.4               |
|                                  | Fixed effect $\pi$               | -                                          | -                                     | 1932.9               |
|                                  | Correlation                      | $t_0, \beta, \delta, \pi$                  | -                                     | 1926.4               |
|                                  | Correlation                      | $t_0, \beta, \pi$                          | -                                     | 1924.9               |
|                                  | Correlation                      | $\beta, \pi$                               | -                                     | 1926.8               |
|                                  | Correlation                      | $\beta$                                    | -                                     | 1923.4               |
|                                  | Correlation                      | -                                          | $t_0, \beta, \delta, \pi$             | 1928.4               |
|                                  | Correlation                      | -                                          | $t_0, \beta$                          | 1926                 |
|                                  | Correlation                      | -                                          | $\beta$                               | 1926.1               |
| Refractory cell model            | Correlation                      | -                                          | -                                     | 1844.4               |
|                                  | Fixed effect $\beta$             | -                                          | -                                     | 1844                 |
|                                  | Fixed effect $\pi$               | -                                          | -                                     | 1839.2               |
|                                  | Fixed effect $\beta$             | $t_0, \beta, \delta, \pi, \Phi, \rho$      | -                                     | 1846.4               |
|                                  | Fixed effect $\beta$             | $\delta, \Phi, \rho$                       | -                                     | 1845.2               |
|                                  | Fixed effect $\beta$             | $\Phi, \rho$                               | -                                     | 1840.5               |
|                                  | Fixed effect $\beta$             | $\Phi$                                     | -                                     | 1838                 |
|                                  | Fixed effect $\beta$             | $\rho$                                     | -                                     | 1843.5               |
|                                  | Fixed effect $\beta$             | $\Phi$                                     | $t_0, \beta, \delta, \pi, \Phi, \rho$ | 1850                 |
|                                  | Fixed effect $\beta$             | $\Phi$                                     | $\beta, \delta, \rho$                 | 1845.7               |
|                                  | Fixed effect $\beta$             | $\Phi$                                     | $\beta, \rho$                         | <b><u>1836.1</u></b> |
|                                  | Fixed effect $\beta$             | $\Phi$                                     | $\beta$                               | 1838.7               |
| Viral production reduction model | Correlation                      | -                                          | -                                     | 1932.3               |
|                                  | Fixed effect $\beta$             | -                                          | -                                     | 1938.6               |
|                                  | Fixed effect $\pi$               | -                                          | -                                     | 1939.9               |
|                                  | Correlation                      | $t_0, \beta, \delta, \pi, \gamma$          | -                                     | 1936.5               |
|                                  | Correlation                      | $\beta, \pi, \gamma$                       | -                                     | 1933.9               |
|                                  | Correlation                      | $\beta, \pi$                               | -                                     | 1931.8               |
|                                  | Correlation                      | $\pi$                                      | -                                     | 1937.6               |
|                                  | Correlation                      | $\beta, \pi$                               | $t_0, \beta, \delta, \pi, \gamma$     | 1933.4               |
|                                  | Correlation                      | $\beta, \pi$                               | $\beta, \pi, \gamma$                  | 1940                 |
| Immune effector cell model       | Correlation                      | -                                          | -                                     | 1931                 |
|                                  | Fixed effect $\beta$             | -                                          | -                                     | 1940.3               |
|                                  | Fixed effect $\pi$               | -                                          | -                                     | 1943.9               |
|                                  | Correlation                      | $t_0, \beta, \delta_1, \pi, t_1, \delta_2$ | -                                     | 1940.9               |
|                                  | Correlation                      | $\beta, \pi, \delta_2$                     | -                                     | 1937.8               |
|                                  | Correlation                      | $\pi, \delta_2$                            | -                                     | 1935.4               |
|                                  | Correlation                      | $\delta_2$                                 | -                                     | 1932.4               |

|                |                      |                                                   |                                                   |        |
|----------------|----------------------|---------------------------------------------------|---------------------------------------------------|--------|
|                | Correlation          | -                                                 | $t_0, \beta, \delta_1, \pi, t_1, \delta_2$        | 1941.9 |
|                | Correlation          | -                                                 | $\delta_1, t_1$                                   | 1934.2 |
|                | Correlation          | -                                                 | $t_1$                                             | 1927.5 |
| Combined model | Correlation          | -                                                 | -                                                 | 1856.8 |
|                | Fixed effect $\beta$ | -                                                 | -                                                 | 1851.4 |
|                | Fixed effect $\pi$   | -                                                 | -                                                 | 1850   |
|                | Fixed effect $\pi$   | $t_0, \beta, \delta_1, \Phi, \rho, t_1, \delta_2$ | -                                                 | 1860   |
|                | Fixed effect $\pi$   | $\delta_1, \Phi, \rho, t_1, \delta_2$             | -                                                 | 1853.7 |
|                | Fixed effect $\pi$   | $\Phi, \rho, t_1, \delta_2$                       | -                                                 | 1850.6 |
|                | Fixed effect $\pi$   | $\Phi, t_1, \delta_2$                             | -                                                 | 1847.6 |
|                | Fixed effect $\pi$   | $t_1, \delta_2$                                   | -                                                 | 1845.8 |
|                | Fixed effect $\pi$   | $t_1$                                             | -                                                 | 1842.4 |
|                | Fixed effect $\pi$   | $t_1$                                             | $t_0, \beta, \delta_1, \Phi, \rho, t_1, \delta_2$ | 1854.5 |
|                | Fixed effect $\pi$   | $t_1$                                             | $\beta, \delta_1, \rho, t_1, \delta_2$            | 1850.5 |
|                | Fixed effect $\pi$   | $t_1$                                             | $\beta, \delta_1, \rho, t_1$                      | 1845.8 |
|                | Fixed effect $\pi$   | $t_1$                                             | $\beta, \rho, t_1$                                | 1846.1 |
|                | Fixed effect $\pi$   | $t_1$                                             | $\rho, t_1$                                       | 1841.5 |
|                | Fixed effect $\pi$   | $t_1$                                             | $\rho$                                            | 1840.2 |

**Table S3. Comparing model fits to longitudinal viral load data from saliva samples using the corrected AIC (AICc) scores.** The best overall model is the immune effector cell model assuming that  $\delta_1$  and  $t_1$  covary with viral type, i.e. non-B1.1.7 vs. B1.1.7 (its AICc score is bolded and underlined).

| Model                            | Assumptions on $\beta$ and $\pi$ | Covariate                                  |                                       | AICc          |
|----------------------------------|----------------------------------|--------------------------------------------|---------------------------------------|---------------|
|                                  |                                  | Age                                        | Viral type                            |               |
| TCL model                        | Correlation                      | -                                          | -                                     | 2126.3        |
|                                  | Fixed effect - $\beta$           | -                                          | -                                     | 2179.1        |
|                                  | Fixed effect - $\pi$             | -                                          | -                                     | 2206.5        |
|                                  | Correlation                      | $t_0, \beta, \delta, \pi$                  | -                                     | 2134.1        |
|                                  | Correlation                      | -                                          | $t_0, \beta, \delta, \pi$             | 2130.1        |
|                                  | Correlation                      | -                                          | $t_0, \beta, \delta$                  | 2127.4        |
|                                  | Correlation                      | -                                          | $t_0, \delta$                         | 2126.1        |
|                                  | Correlation                      | -                                          | $t_0$                                 | 2128.7        |
|                                  | Correlation                      | -                                          | $\delta$                              | 2125.6        |
| Refractory cell model            | Correlation                      | -                                          | -                                     | 2110.9        |
|                                  | Fixed effect $\beta$             | -                                          | -                                     | 2139.6        |
|                                  | Fixed effect $\pi$               | -                                          | -                                     | 2132.5        |
|                                  | Correlation                      | $t_0, \beta, \delta, \pi, \Phi, \rho$      | -                                     | 2122.6        |
|                                  | Correlation                      | $\beta, \pi$                               | -                                     | 2111.7        |
|                                  | Correlation                      | $\beta$                                    | -                                     | 2111.9        |
|                                  | Correlation                      | $\pi$                                      | -                                     | 2111.8        |
|                                  | Correlation                      | -                                          | $t_0, \beta, \delta, \pi, \Phi, \rho$ | 2107.6        |
|                                  | Correlation                      | -                                          | $t_0, \beta, \delta, \pi, \rho$       | 2107.8        |
|                                  | Correlation                      | -                                          | $t_0, \beta, \pi, \rho$               | 2109.3        |
|                                  | Correlation                      | -                                          | $\beta, \pi, \rho$                    | 2113.2        |
|                                  | Correlation                      | -                                          | $\beta, \rho$                         | 2112          |
| Viral production reduction model | Correlation                      | -                                          | -                                     | 2099.7        |
|                                  | Fixed effect $\beta$             | -                                          | -                                     | 2139.9        |
|                                  | Fixed effect $\pi$               | -                                          | -                                     | 2179.3        |
|                                  | Correlation                      | $t_0, \beta, \delta, \pi, \gamma$          | -                                     | 2104.2        |
|                                  | Correlation                      | $\delta, \pi, \gamma$                      | -                                     | 2102.6        |
|                                  | Correlation                      | $\delta, \gamma$                           | -                                     | 2103.1        |
|                                  | Correlation                      | $\delta$                                   | -                                     | 2101.2        |
|                                  | Correlation                      | -                                          | $t_0, \beta, \delta, \pi, \gamma$     | 2096.5        |
|                                  | Correlation                      | -                                          | $t_0, \beta, \delta, \gamma$          | 2100.8        |
|                                  | Correlation                      | -                                          | $t_0, \delta, \gamma$                 | 2099.9        |
|                                  | Correlation                      | -                                          | $\gamma$                              | 2100.4        |
| Immune effector cell model       | Correlation                      | -                                          | -                                     | 2078.4        |
|                                  | Fixed effect $\beta$             | -                                          | -                                     | 2118.2        |
|                                  | Fixed effect $\pi$               | -                                          | -                                     | 2155.4        |
|                                  | Correlation                      | $t_0, \beta, \delta_1, \pi, t_1, \delta_2$ | -                                     | 2081.1        |
|                                  | Correlation                      | $t_0, \delta_1, t_1, \delta_2$             | -                                     | 2078          |
|                                  | Correlation                      | $t_0, \delta_1, t_1$                       | -                                     | 2079.1        |
|                                  | Correlation                      | $t_0, \delta_1$                            | -                                     | <b>2076.9</b> |

|                |                      |                                                        |                                                        |               |
|----------------|----------------------|--------------------------------------------------------|--------------------------------------------------------|---------------|
|                | Correlation          | $t_0$                                                  | -                                                      | 2078.1        |
|                | Correlation          | -                                                      | $t_0, \beta, \delta_1, \pi, t_1, \delta_2$             | 2079.3        |
|                | Correlation          | -                                                      | $t_0, \beta, \delta_1, t_1, \delta_2$                  | 2077.4        |
|                | Correlation          | -                                                      | $t_0, \delta_1, t_1, \delta_2$                         | 2078.7        |
|                | Correlation          | -                                                      | $t_0, \delta_1, t_1$                                   | 2076.6        |
|                | Correlation          | -                                                      | $\delta_1, t_1$                                        | <b>2074.0</b> |
|                | Correlation          | -                                                      | $\delta_1$                                             | 2078.2        |
|                | Correlation          | -                                                      | $t_1$                                                  | 2076.9        |
| Combined model | Correlation          | -                                                      | -                                                      | 2095.7        |
|                | Fixed effect $\beta$ | -                                                      | -                                                      | 2080.9        |
|                | Fixed effect $\pi$   | -                                                      | -                                                      | 2081.8        |
|                | Fixed effect $\beta$ | $t_0, \beta, \delta_1, \pi, \Phi, \rho, t_1, \delta_2$ | -                                                      | 2096.2        |
|                | Fixed effect $\beta$ | $\pi$                                                  | -                                                      | 2083.6        |
|                | Fixed effect $\beta$ | -                                                      | $t_0, \beta, \delta_1, \pi, \Phi, \rho, t_1, \delta_2$ | 2084.8        |
|                | Fixed effect $\beta$ | -                                                      | $t_0, \delta_1, \pi, \Phi, t_1$                        | 2085          |
|                | Fixed effect $\beta$ | -                                                      | $t_0, \delta_1, \pi, \Phi$                             | 2081          |
|                | Fixed effect $\beta$ | -                                                      | $t_0, \delta_1, \Phi$                                  | 2087.5        |
|                | Fixed effect $\beta$ | -                                                      | $t_0, \delta_1$                                        | 2087.4        |

**Table S4. Estimated population parameter values from the best models, i.e., the refractory cell model for the nasal compartment and the effector cell model for the saliva compartment.** The means and standard deviations are derived assuming that individual parameters follow log-normal distributions (except for  $t_0$  and  $t_1$ ).

| Model                                     | Parameter                | Description                                                                             | Mean (population estimate)   | Standard deviation* |
|-------------------------------------------|--------------------------|-----------------------------------------------------------------------------------------|------------------------------|---------------------|
| Refractory cell model (Nasal compartment) | $t_0$                    | Estimated time of infection in nasal relative to the day of diagnosis                   | -2.1 days                    | 1.7 days            |
|                                           | $\beta$ (non-B.1.1.7)    | Infectivity parameter constant                                                          | $4.92 \times 10^{-9}$ mL/day | 0.16                |
|                                           | $\beta$ (B.1.1.7)        |                                                                                         | $4.02 \times 10^{-9}$ mL/day |                     |
|                                           | $\delta$                 | Death rate of infected cells                                                            | 2.45 /day                    | 0.24                |
|                                           | $\pi$                    | Composite parameter for virus production and sampling                                   | 376.3 /day                   | -                   |
|                                           | $\Phi$                   | Rate constant for the interferon-induced conversion of target cells to refractory cells | $3.45 \times 10^{-5}$ mL/day | 1.1                 |
|                                           | $\sigma_\Phi$            | Coefficient of the covariate, age, on $\Phi$                                            | -0.044                       | -                   |
|                                           | $\rho$ (non-B.1.1.7)     | Rate at which refractory cells become target cells again                                | 0.0119 /day                  | 0.07                |
|                                           | $\rho$ (B.1.1.7)         |                                                                                         | 0.0123 /day                  |                     |
| Effector cell model (Saliva compartment)  | $t_0$                    | Estimated time of infection in nasal relative to the day of diagnosis                   | -2.8 days                    | 0.29 days           |
|                                           | $\beta$                  | Infectivity parameter constant                                                          | $7.35 \times 10^{-7}$ mL/day | 1.9                 |
|                                           | $\delta_1$ (non-B.1.1.7) | Death rate of infected cells in the absence of effector cell responses                  | 0.58 /day                    | 0.2                 |
|                                           | $\delta_1$ (B.1.1.7)     |                                                                                         | 0.05 /day                    |                     |
|                                           | $\pi$                    | Composite parameter for virus production and sampling                                   | 4.16 /day                    | 1.8                 |
|                                           | $t_1$ (non-B.1.1.7)      | Time when the effector cell response is developed relative to the day of diagnosis      | 11.1 days                    | 3.5 days            |
|                                           | $t_1$ (B.1.1.7)          |                                                                                         | 3.7 days                     |                     |
|                                           | $\delta_2$               | The increase in infected cell killing due to the effector cell response                 | 1.1 /day                     | 0.35                |
|                                           | $\chi$                   | Correlation between $\beta$ and $\pi$                                                   | -0.955                       | -                   |

\* All the population parameters except for  $t_0$  and  $t_1$  are assumed to follow log-normal distributions in the population, and therefore, the report standard deviation is for a log-normal distribution. Parameters  $t_0$  and  $t_1$  and assumed to be normally distributed.

**Table S5. Individual parameter values estimated from the best fit models, i.e. the refractory cell model and the effector cell model for viral dynamics in the nasal and saliva compartment respectively. 'NA' denotes individuals where data are not included in parameter estimation.**

| ID     | Refractory cell model |                                |                    |                 |                                |                  | Effector cell model |                                |                      |                 |                |                      |
|--------|-----------------------|--------------------------------|--------------------|-----------------|--------------------------------|------------------|---------------------|--------------------------------|----------------------|-----------------|----------------|----------------------|
|        | $t_0$<br>(day)        | $\beta$ ( $10^{-8}$<br>mL/day) | $\delta$<br>(/day) | $\pi$<br>(/day) | $\Phi$<br>( $10^{-6}$<br>/day) | $\rho$<br>(/day) | $t_0$<br>(day)      | $\beta$ ( $10^{-8}$<br>mL/day) | $\delta_1$<br>(/day) | $\pi$<br>(/day) | $t_1$<br>(day) | $\delta_2$<br>(/day) |
| 432192 | 0.8                   | 0.5                            | 2.5                | 378.9           | 11.72                          | 0.0120           | -2.8                | 477.9                          | 0.6                  | 0.7             | 13.86          | 1.1                  |
| 432568 | 4                     | 0.5                            | 2.5                | 378.9           | 17.18                          | 0.0119           | -2.8                | 49.3                           | 0.6                  | 5.5             | 11.05          | 1.1                  |
| 432662 | 1.6                   | 0.5                            | 2.8                | 378.9           | 14.86                          | 0.0119           | -2.7                | 27.1                           | 0.5                  | 6.3             | 11.32          | 1.1                  |
| 432686 | 2.3                   | 0.5                            | 2.4                | 378.9           | 12.65                          | 0.0120           | -2.8                | 28.8                           | 0.5                  | 7.4             | 14.7           | 1                    |
| 432864 | 1.1                   | 0.5                            | 2.5                | 378.9           | 0.86                           | 0.0120           | -2.9                | 38.1                           | 0.5                  | 9.2             | 8.1            | 1.1                  |
| 432870 | 0.6                   | 0.5                            | 2.8                | 378.9           | 23.63                          | 0.0119           | -2.7                | 28                             | 0.6                  | 7.1             | 9.74           | 1.1                  |
| 433227 | -0.6                  | 0.5                            | 2.4                | 378.9           | 5.73                           | 0.0120           | -2.8                | 31.7                           | 0.5                  | 7.4             | 11.03          | 1.1                  |
| 433409 | 2.4                   | 0.5                            | 2.8                | 378.9           | 12.77                          | 0.0118           | -2.8                | 47.3                           | 0.6                  | 6.6             | 11.08          | 1.1                  |
| 435729 | 3.6                   | 0.5                            | 2.3                | 378.9           | 8.79                           | 0.0120           | NA                  | NA                             | NA                   | NA              | NA             | NA                   |
| 435772 | -0.2                  | 0.5                            | 2.9                | 378.9           | 5.97                           | 0.0118           | -2.7                | 238.2                          | 0.5                  | 0.3             | 11.01          | 1.1                  |
| 435786 | 3.2                   | 0.5                            | 2.1                | 378.9           | 6.69                           | 0.0119           | -2.9                | 31.8                           | 0.6                  | 9.7             | 11.82          | 1.2                  |
| 435794 | 2.7                   | 0.5                            | 2.7                | 378.9           | 5.37                           | 0.0119           | -2.8                | 73.8                           | 0.7                  | 4.1             | 13.67          | 1                    |
| 435805 | 2.6                   | 0.5                            | 2.2                | 378.9           | 7.22                           | 0.0119           | -2.8                | 23.6                           | 0.5                  | 10.9            | 13.25          | 1                    |
| 435933 | -2.4                  | 0.5                            | 3.1                | 378.9           | 15.52                          | 0.0118           | -2.9                | 199.9                          | 0.5                  | 1.7             | 9.66           | 1.1                  |
| 435985 | 1.4                   | 0.4                            | 2.6                | 378.9           | 3.31                           | 0.0120           | -2.8                | 447.5                          | 0.7                  | 0.6             | 9.76           | 1.2                  |
| 437388 | 3.1                   | 0.5                            | 2.3                | 378.9           | 15.46                          | 0.0119           | -2.8                | 30.3                           | 0.6                  | 6.6             | 11.04          | 1.1                  |
| 438577 | 2.5                   | 0.5                            | 2.8                | 378.9           | 1.94                           | 0.0118           | -2.7                | 16.1                           | 0.6                  | 11.5            | 7.22           | 0.9                  |
| 441582 | 1.1                   | 0.5                            | 2.1                | 378.9           | 17.92                          | 0.0120           | -2.8                | 317.2                          | 0.6                  | 1.1             | 5.85           | 1.4                  |
| 441736 | 1.9                   | 0.5                            | 2.5                | 378.9           | 5.35                           | 0.0119           | -2.8                | 316.2                          | 0.6                  | 1               | 8              | 1.3                  |
| 441925 | 2.3                   | 0.5                            | 2.5                | 378.9           | 8.11                           | 0.0119           | -2.9                | 76.8                           | 0.6                  | 4.7             | 10.79          | 0.9                  |
| 442978 | 2.2                   | 0.5                            | 1.9                | 378.9           | 12.19                          | 0.0119           | -2.9                | 41.8                           | 0.5                  | 8.3             | 14.42          | 1                    |
| 443108 | 1.4                   | 0.5                            | 2.7                | 378.9           | 2.32                           | 0.0118           | -2.8                | 24.2                           | 0.6                  | 8.6             | 11.51          | 1.1                  |
| 443176 | 3.9                   | 0.5                            | 2.4                | 378.9           | 23.12                          | 0.0119           | -2.9                | 66.2                           | 0.6                  | 6               | 12.2           | 1.1                  |
| 443240 | NA                    | NA                             | NA                 | NA              | NA                             | NA               | NA                  | NA                             | NA                   | NA              | NA             | NA                   |
| 444316 | 1.3                   | 0.5                            | 2.4                | 378.9           | 25.77                          | 0.0121           | -2.8                | 1619.5                         | 0.6                  | 0.2             | 5.68           | 1.3                  |
| 444332 | 0.1                   | 0.5                            | 1.6                | 378.9           | 3.9                            | 0.0121           | -2.8                | 8.8                            | 0.5                  | 19.6            | 14.92          | 1                    |
| 444349 | 2.2                   | 0.5                            | 3.2                | 378.9           | 14.01                          | 0.0117           | -2.8                | 189.8                          | 0.7                  | 1.5             | 12.75          | 1                    |
| 444391 | 1.4                   | 0.4                            | 2.3                | 378.9           | 0.85                           | 0.0119           | -2.8                | 86.2                           | 0.6                  | 3.1             | 11.86          | 1                    |
| 444446 | 2.7                   | 0.5                            | 2.6                | 378.9           | 5.75                           | 0.0119           | -2.8                | 10.8                           | 0.5                  | 24.8            | 14.47          | 1                    |
| 444633 | 1.2                   | 0.5                            | 2.7                | 378.9           | 6.55                           | 0.0120           | -2.8                | 27.1                           | 0.5                  | 13.1            | 14.73          | 1                    |
| 445534 | 3.2                   | 0.5                            | 2.7                | 378.9           | 21.37                          | 0.0119           | -2.9                | 275.5                          | 0.6                  | 1.5             | 6.87           | 1.5                  |
| 445535 | 2.1                   | 0.5                            | 2.2                | 378.9           | 0.96                           | 0.0119           | -2.8                | 10.9                           | 0.6                  | 21.6            | 8.28           | 1.4                  |

|        |      |     |     |       |       |        |      |        |     |       |       |     |
|--------|------|-----|-----|-------|-------|--------|------|--------|-----|-------|-------|-----|
| 445602 | 0.3  | 0.5 | 2.4 | 378.9 | 12.4  | 0.0120 | -2.8 | 0.2    | 0.5 | 712.9 | 10.21 | 0.9 |
| 446645 | 4.3  | 0.6 | 1.7 | 378.9 | 10.28 | 0.0122 | -2.8 | 827.4  | 0.6 | 0.4   | 10.73 | 1.1 |
| 449474 | NA   | NA  | NA  | NA    | NA    | NA     | NA   | NA     | NA  | NA    | NA    | NA  |
| 449507 | 1.1  | 0.5 | 2.9 | 378.9 | 38.89 | 0.0119 | -2.9 | 490.3  | 0.7 | 0.9   | 13.93 | 1.1 |
| 449527 | 4.7  | 0.6 | 2.1 | 378.9 | 24.93 | 0.0121 | -2.8 | 250    | 0.6 | 1.3   | 6.42  | 1.1 |
| 449614 | 4.2  | 0.5 | 2.6 | 378.9 | 33.43 | 0.0120 | -2.9 | 401    | 0.7 | 1.1   | 5.63  | 1.2 |
| 450241 | 2.2  | 0.4 | 1.9 | 378.9 | 1.54  | 0.0123 | -2.7 | 159.4  | 0   | 1     | 10.87 | 1   |
| 450253 | 0.9  | 0.4 | 3.2 | 378.9 | 25.58 | 0.0122 | -2.8 | 166.8  | 0   | 1.6   | 6.88  | 2.3 |
| 451146 | NA   | NA  | NA  | NA    | NA    | NA     | -2.9 | 171.3  | 0   | 2     | 0.39  | 1.7 |
| 451152 | 1.1  | 0.5 | 2.4 | 378.9 | 12.88 | 0.0119 | -2.8 | 3      | 0.6 | 60.6  | 10.97 | 1.1 |
| 451231 | 2.8  | 0.5 | 2.6 | 378.9 | 7.02  | 0.0119 | -2.8 | 23.1   | 0.6 | 9.4   | 9.87  | 1.1 |
| 451346 | 2.4  | 0.5 | 2.6 | 378.9 | 6.9   | 0.0120 | -2.8 | 259.7  | 0.6 | 1.1   | 8.49  | 1.2 |
| 451479 | 5.1  | 0.5 | 2.6 | 378.9 | 41.51 | 0.0119 | -2.9 | 1812.4 | 0.7 | 0.3   | 10.01 | 1.2 |
| 451709 | 0.7  | 0.4 | 2   | 378.9 | 28.13 | 0.0125 | -2.8 | 8.9    | 0   | 18.8  | 8.61  | 1.5 |
| 453058 | 2.7  | 0.5 | 1.4 | 378.9 | 1.83  | 0.0122 | -2.9 | 10.9   | 0.6 | 35    | 11.04 | 1.1 |
| 453724 | NA   | NA  | NA  | NA    | NA    | NA     | -2.7 | 337.2  | 0.6 | 0.2   | 7.73  | 1.6 |
| 459589 | 3.2  | 0.4 | 2.7 | 378.9 | 15.97 | 0.0122 | -2.9 | 34.3   | 0   | 11    | 0.82  | 1.3 |
| 459597 | -0.6 | 0.4 | 3.2 | 378.9 | 16.13 | 0.0122 | -2.8 | 93.8   | 0   | 2.9   | 5.77  | 1.3 |
| 461379 | 2.9  | 0.4 | 2.5 | 378.9 | 5.72  | 0.0123 | -2.8 | 182.6  | 0   | 1.6   | 0.54  | 0.9 |
| 461764 | 3    | 0.4 | 2.1 | 378.9 | 11    | 0.0125 | -2.9 | 38.7   | 0   | 10.4  | 2.26  | 1.1 |
| 461771 | 2.4  | 0.4 | 2.4 | 378.9 | 5.33  | 0.0123 | -2.7 | 137.5  | 0   | 1.5   | 2.23  | 0.8 |
| 469115 | 0.6  | 0.4 | 2.4 | 378.9 | 20.79 | 0.0124 | -2.7 | 73.4   | 0   | 2.8   | 5.05  | 0.9 |
| 470855 | 0    | 0.5 | 2.7 | 378.9 | 33.4  | 0.0119 | NA   | NA     | NA  | NA    | NA    | NA  |
| 471467 | -0.4 | 0.4 | 2.8 | 378.9 | 27.3  | 0.0122 | -2.9 | 1      | 0   | 240   | 3.68  | 0.9 |
| 471588 | 2.6  | 0.4 | 1.9 | 378.9 | 6.53  | 0.0125 | -2.8 | 20.5   | 0   | 13.4  | 3.82  | 0.8 |
| 471890 | 3    | 0.4 | 1.4 | 378.9 | 4.52  | 0.0126 | -2.8 | 88.7   | 0   | 3.6   | 0.21  | 1.1 |
| 473097 | 5.3  | 0.4 | 2.8 | 378.9 | 9.24  | 0.0121 | -2.9 | 88.2   | 0   | 4.2   | 1.68  | 1.1 |
| 473107 | 3.1  | 0.4 | 3   | 378.9 | 2.14  | 0.0122 | -2.8 | 12.2   | 0   | 20.7  | 2.9   | 1.1 |



**Table S6. The fixed parameters and their values in all viral dynamic models.** The initial values of variables are set to 0 except for the two initial values listed below.

| <b>Parameter</b> | <b>Description</b>                            | <b>Values</b>                                                       | <b>Reference</b>           |
|------------------|-----------------------------------------------|---------------------------------------------------------------------|----------------------------|
| $T_0$            | Total number of (infection free) target cells | $8 \times 10^7$ cells (nasal) and $1.08 \times 10^8$ cells (saliva) | See Supplementary Material |
| $E_0$            | Initial number of infected cells              | 1 cell                                                              | See Supplementary Material |
| c                | Virus clearance rate                          | 10/day                                                              | (2, 3)                     |
| k                | 1/k is the eclipse period                     | 4/day                                                               | (2, 3)                     |

**Table S7. Model comparison using AICc scores of three models describing the relationship between the viral genome load and cell culture positivity.** In each model, we varied the assumption whether a parameter has random effects or only fixed effects. The lowest AICc score, indicating the best model, is bolded and underlined.

| Model            | Parameter assumptions |                   | AICc                |
|------------------|-----------------------|-------------------|---------------------|
|                  | Random effects        | Fixed effect only |                     |
| Linear model     | $A$                   | -                 | 336.7               |
|                  | -                     | $A$               | 481.6               |
| Power-Law model  | $G, h$                | -                 | 322                 |
|                  | $h$                   | $G$               | 319.6               |
|                  | $G$                   | $h$               | 323.4               |
|                  | -                     | $h, G$            | 349.2               |
| Saturation model | $J, h, K_m$           | -                 | 319.2               |
|                  | $h, K_m$              | $J$               | 319.2               |
|                  | $J, K_m$              | $h$               | 325.4               |
|                  | $J, h$                | $K_m$             | <b><u>314.7</u></b> |
|                  | $J$                   | $h, K_m$          | 322.1               |
|                  | $h$                   | $J, K_m$          | 330.9               |
|                  | $K_m$                 | $J, h$            | 323.7               |
|                  | -                     | $J, h, K_m$       | 346                 |

**Table S8. The estimated parameters in the best-fit model to the paired RTqPCR and cell culture positivity data, i.e. the saturation model assuming  $K_m$  has fixed effect only. The population estimates of  $J, h$  and  $K_m$  are  $10.5, 1.2$  and  $4.5 \times 10^6$  /mL, respectively.**

| ID     | Parameter |      | ID     | Parameter |      |
|--------|-----------|------|--------|-----------|------|
|        | $J$       | $h$  |        | $J$       | $h$  |
| 432192 | 9.42      | 1.47 | 444633 | 12.02     | 1.54 |
| 432568 | 2.74      | 0.8  | 445534 | 18.28     | 1.18 |
| 432662 | 16.08     | 1.25 | 445535 | 18.87     | 1.08 |
| 432686 | 12.17     | 1.26 | 445602 | 14.75     | 1.09 |
| 432864 | 13.59     | 1.36 | 446645 | 13.53     | 1.71 |
| 432870 | 4.57      | 0.54 | 449507 | 9.05      | 0.7  |
| 433227 | 13.15     | 1.49 | 449527 | 11.51     | 1.28 |
| 433409 | 2.74      | 0.47 | 449614 | 11.34     | 1.58 |
| 435729 | 13.47     | 1.32 | 450241 | 17.96     | 1.74 |
| 435772 | 8.43      | 1.45 | 450253 | 2.49      | 0.87 |
| 435786 | 2.11      | 0.34 | 451152 | 12.22     | 1.38 |
| 435794 | 14.22     | 0.96 | 451231 | 11.89     | 1.25 |
| 435805 | 13.27     | 0.6  | 451346 | 15.87     | 1.22 |
| 435933 | 12.02     | 1.08 | 451479 | 10.97     | 1.21 |
| 435985 | 8.99      | 0.61 | 451709 | 15.6      | 1.76 |
| 437388 | 18.2      | 1.21 | 453058 | 4.08      | 1.1  |
| 438577 | 12.18     | 1.46 | 459589 | 9.69      | 1.55 |
| 441582 | 24.51     | 1.01 | 459597 | 1.4       | 0.72 |
| 441736 | 21.38     | 0.93 | 461379 | 8.92      | 1.49 |
| 441925 | 9.13      | 1.5  | 461764 | 3.18      | 1.2  |
| 442978 | 19.63     | 0.83 | 461771 | 14.5      | 1.97 |
| 443108 | 20.52     | 0.85 | 469115 | 8.65      | 1.38 |
| 443176 | 12.1      | 1.47 | 470855 | 9.43      | 1.61 |
| 444316 | 10.46     | 0.86 | 471467 | 12.29     | 1.58 |
| 444332 | 2.97      | 0.85 | 471588 | 0.63      | 0.54 |
| 444349 | 17.65     | 1    | 471890 | 2.29      | 0.96 |
| 444391 | 27.23     | 0.95 | 473097 | 16.3      | 1.56 |
| 444446 | 11.09     | 1.21 | 473107 | 19.37     | 1.38 |

**Table S9: Viral genotype data**

| <b>Participant ID number:</b> | <b>Date of enrollment:</b> | <b>Pangolin_lineage:</b> |
|-------------------------------|----------------------------|--------------------------|
| 432192                        | 12/2/20                    | B.1.576                  |
| 432568                        | 12/5/20                    | B.1.2                    |
| 432662                        | 12/6/20                    | B.1.2                    |
| 432686                        | 12/6/20                    | B.1.2                    |
| 432864                        | 12/8/20                    | B.1.1                    |
| 432870                        | 12/8/20                    | B.1.2                    |
| 433227                        | 12/11/20                   | B.1.2                    |
| 433409                        | 12/13/20                   | B.1.2                    |
| 435729                        | 1/4/21                     | B.1.582                  |
| 435772                        | 1/5/21                     | B.1.1.207                |
| 435786                        | 1/5/21                     | B.1.2                    |
| 435794                        | 1/5/21                     | B.1.2                    |
| 435805                        | 1/5/21                     | B.1.2                    |
| 435933                        | 1/6/21                     | B.1.2                    |
| 435985                        | 1/6/21                     | B.1.2                    |
| 437388                        | 1/8/21                     | B.1.2                    |
| 438577                        | 1/9/21                     | B.1.311                  |
| 441582                        | 1/11/21                    | B.1.2                    |
| 441736                        | 1/11/21                    | B.1.2                    |
| 441925                        | 1/11/21                    | B.1.2                    |
| 442978                        | 1/12/21                    | B.1.2                    |
| 443108                        | 1/12/21                    | B.1.2                    |
| 443176                        | 1/12/21                    | B.1.2                    |
| 443240                        | 1/12/21                    | B.1.1.7                  |
| 444316                        | 1/13/21                    | B.1.577                  |
| 444332                        | 1/13/21                    | B.1.2                    |
| 444349                        | 1/13/21                    | B.1.596                  |
| 444391                        | 1/13/21                    | B.1.2                    |
| 444446                        | 1/13/21                    | B.1.568                  |
| 444633                        | 1/13/21                    | B.1.2                    |
| 445534                        | 1/14/21                    | B.1.2                    |
| 445535                        | 1/14/21                    | B.1.1.207                |
| 445602                        | 1/14/21                    | B.1.2                    |
| 446645                        | 1/15/21                    | B.1.2                    |
| 449474                        | 1/18/21                    | B.1.2                    |
| 449507                        | 1/18/21                    | B.1.2                    |
| 449527                        | 1/18/21                    | B.1.2                    |
| 449614                        | 1/18/21                    | B.1.243                  |
| 450241                        | 1/20/21                    | B.1.1.7                  |

|        |         |           |
|--------|---------|-----------|
| 450253 | 1/20/21 | B.1.1.7   |
| 451146 | 1/27/21 | B.1.1.7   |
| 451152 | 1/27/21 | C.31      |
| 451231 | 1/28/21 | B.1.2     |
| 451346 | 1/29/21 | B.1.1.519 |
| 451479 | 1/30/21 | B.1.2     |
| 451709 | 2/2/21  | B.1.1.7   |
| 453058 | 2/5/21  | B.1.2     |
| 453724 | 2/10/21 | B.1.2     |
| 459589 | 2/20/21 | B.1.1.7   |
| 459597 | 2/20/21 | B.1.1.7   |
| 461379 | 3/3/21  | B.1.1.7   |
| 461764 | 3/4/21  | B.1.1.7   |
| 461771 | 3/4/21  | B.1.1.7   |
| 469115 | 3/20/21 | B.1.1.7   |
| 470855 | 3/23/21 | P.1       |
| 471467 | 3/24/21 | B.1.1.7   |
| 471588 | 3/24/21 | B.1.1.7   |
| 471890 | 3/25/21 | B.1.1.7   |
| 473097 | 3/28/21 | B.1.1.7   |
| 473107 | 3/28/21 | B.1.1.7   |

**Table S10. CN values and the measured viral genome loads used for the viral genome load calibration curve for nasal samples.**

| <b>CN value</b> | <b>N1 (/mL)</b> | <b>RP (/mL)</b> | <b>N2 (/mL)</b> | <b>CN value</b> | <b>N1 (/mL)</b> | <b>RP (/mL)</b> | <b>N2 (/mL)</b> |
|-----------------|-----------------|-----------------|-----------------|-----------------|-----------------|-----------------|-----------------|
| 17.39           | 386610.82       | 1453.94         | 451848.20       | 32.17           | 593.24          | 7542.15         | 659.18          |
| 17.69           | 290396.11       | 193.97          | 264061.25       | 31.73           | 468.42          | 9176.54         | 292.74          |
| 18.18           | 379840.39       | 66.18           | 347221.72       | 36.71           | 122.78          | 28163.88        | 122.78          |
| 19.87           | 168508.79       | 1165.59         | 161205.60       | 30.14           | 2001.28         | 8091.87         | 1879.87         |
| 20.05           | 75386.10        | 111.95          | 75100.57        | 34.64           | 987.01          | 16984.38        | 801.87          |
| 21.97           | 66955.68        | 1390.31         | 65625.98        | 33.40           | 12465.10        | 7639.70         | 15569.42        |
| 22.56           | 22409.81        | 601.38          | 21220.05        | 30.20           | 1638.25         | 1501.62         | 1706.58         |
| 23.46           | 11620.21        | 2163.67         | 11656.56        | 34.08           | 1451.78         | 2542.09         | 1270.18         |
| 24.45           | 6354.91         | 1063.48         | 6105.84         | 31.53           | 2467.46         | 5310.41         | 2782.92         |
| 25.33           | 10905.32        | 19975.47        | 10490.55        | 30.90           | 5200.57         | 41850.98        | 5511.03         |
| 26.32           | 3025.46         | 148.98          | 2958.09         | 33.52           | 1.00            | 13603.26        | 206.74          |
| 27.31           | 374.47          | 347.19          | 356.28          | 33.28           | 436.99          | 3689.54         | 312.11          |
| 28.54           | 172.40          | 94.92           | 158.30          | 31.71           | 2829.52         | 3410.98         | 2538.92         |
| 29.56           | 103.01          | 53.38           | 103.01          | 35.66           | 237.54          | 13214.54        | 772.21          |
| 29.76           | 117.64          | 180.78          | 100.81          | 34.62           | 393.83          | 151007.75       | 656.47          |
|                 |                 |                 |                 | 38.95           | 254.23          | 17640.56        | 572.12          |

**Table S11. Ct values and the measured viral genome loads used for the viral genome load calibration curve for saliva samples.**

| <b>Ct value</b> | <b>N gene load (/mL)</b> |  | <b>Ct value</b> | <b>N gene load (/mL)</b> |
|-----------------|--------------------------|--|-----------------|--------------------------|
| 1.80E+07        | 25.2                     |  | 1.80E+04        | 35.5                     |
| 1.80E+07        | 25.2                     |  | 1.80E+04        | 36.2                     |
| 1.80E+07        | 25.0                     |  | 1.80E+04        | 37.7                     |
| 1.80E+06        | 28.7                     |  | 1.80E+03        | 38.4                     |
| 1.80E+06        | 28.4                     |  | 1.80E+03        | 37.8                     |
| 1.80E+06        | 28.3                     |  | 1.80E+03        | 37.8                     |
| 1.80E+05        | 30.8                     |  | 5.40E+04        | 33.6                     |
| 1.80E+05        | 31.5                     |  | 5.40E+04        | 33.4                     |
| 1.80E+05        | 31.8                     |  | 5.40E+04        | 34.5                     |
| 1.80E+04        | 35.1                     |  | 6.00E+03        | 38.9                     |
| 1.80E+04        | 34.4                     |  | 6.00E+03        | 35.2                     |
| 1.80E+04        | 35.2                     |  | 6.00E+03        | 36.2                     |
